# Supplementary material
Source: PubMed Central journal article supplement (PMC5967426)

Anne Legrand<sup>1,2</sup>, Cyrielle Treard<sup>1</sup>, Isabelle Roncelin<sup>1</sup>, Sophie Dreux<sup>3</sup>, Aurélia Bertholet-Thomas<sup>4,5</sup>, Françoise Broux<sup>6</sup>, Daniele Bruno<sup>7</sup>, Stéphane Decramer<sup>8,9</sup>, Georges Deschenes<sup>10,11</sup>, Djamal Djeddi<sup>12</sup>, Vincent Guignon<sup>9,13</sup>, Nadine Jay<sup>14</sup>, Tackwa Khalifeh<sup>15</sup>, Brigitte Llanas<sup>9,16</sup>, Denis Morin<sup>9,17</sup>, Gilles Morin<sup>18</sup>, François Nobili<sup>19</sup>, Christine Pietrement<sup>20</sup>, Amélie Ryckewaert<sup>21</sup>, Rémi Salomon<sup>11,22</sup>, Isabelle Vrillon<sup>23</sup>, Anne Blanchard<sup>2,11,24,25</sup> and Rosa Vargas-Poussou<sup>1,11,25</sup>

<sup>1</sup>Department of Genetics, Hôpital Européen Georges Pompidou, Assistance Publique-Hôpitaux de Paris, Paris, France. <sup>2</sup>Faculté de Médecine, Université Paris Descartes, Sorbonne Paris Cité, Paris, France. <sup>3</sup>Department of Biochemistry-hormonology, Hôpital Robert Debré, Assistance Publique-Hôpitaux de Paris, Paris, France. <sup>4</sup>Néphrogones, Centre de Référence des Maladies Rénales Rares, Lyon, France. <sup>5</sup>Pediatric Nephrology, Rheumatology and Dermatology Unit, Hôpital Femme-Mère-Enfant, Hospices Civils de Lyon, Lyon, France. <sup>6</sup>Department of Pediatrics, Centre Hospitalier Universitaire Charles Nicolle, Rouen, France. <sup>7</sup>Pediatric Nephrology Unit, Hôpital de la Timone, Assistance Publique des Hôpitaux de Marseille, Marseille, France. <sup>8</sup>Département of Pediatrics, Hôpital de Toulouse, Université Paul Sabatier, Toulouse, France. <sup>9</sup>Centre de Référence des Maladies Rénales Rares du Sud-Ouest (SORARE), France. <sup>10</sup>Pediatric Nephrology Unit, Hôpital Robert Debré, Assistance Publique-Hôpitaux de Paris, Paris, France. <sup>11</sup>Centre de Référence des Maladies Rénales Héritaires de l'Enfant et de l'Adulte (MARHEA). <sup>12</sup>Department of Pediatrics and Adolescent Medicine, Centre Hospitalier Universitaire d'Amiens, -Picardie, Amiens, France. <sup>13</sup>Department of Pediatrics, Hôpital de la mère et de l'enfant, Centre Hospitalier Universitaire de Limoges, Limoges, France. <sup>14</sup>Department of Pediatrics and Medical Genetics, Centre Hospitalier Universitaire de Brest, Brest, France. <sup>15</sup>Department of Pediatrics, Centre Hospitalier Universitaire de Poitiers, Poitiers, France, <sup>16</sup>Pediatric Nephrology Unit, Hôpital Pellegrin-

Enfants, Centre Hospitalier Universitaire de Bordeaux, Bordeaux, France. <sup>17</sup>Pediatric Nephrology Unit, Centre Hospitalier Universitaire de Montpellier, Montpellier, France. <sup>18</sup>Department of Genetics, Centre Hospitalier Universitaire Amiens-Picardie, Amiens, France. <sup>19</sup>Pediatric Nephrology Unit, Centre Hospitalier Universitaire de Besançon, Besançon, France. <sup>20</sup>Pediatric Nephrology Unit, American Memorial Hospital, Centre Hospitalier Universitaire de Reims, Reims, France. <sup>21</sup>Pediatric Nephrology Unit, Centre Hospitalier Universitaire de Rennes, Rennes, France. <sup>22</sup>Pediatric Nephrology Unit, Hôpital Necker-Enfants-malades, Assistance Publique des Hôpitaux de Paris, Paris, France. <sup>23</sup>Pediatric Nephrology Unit, Hôpitaux de Brabois, Centre Hospitalier Universitaire de Nancy, Vandoeuvre Les Nancy, France. <sup>24</sup>Centre d'Investigation Clinique, Hôpital Européen Georges Pompidou, Assistance Publique-Hôpitaux de Paris, Paris, France. <sup>25</sup>Institut National de la Santé et la Recherche Médicale, Unité Mixte de Recherche en Santé 970, Paris-Cardiovascular Research Center, Paris, France.

Supplemental material is neither peer-reviewed nor thoroughly edited by CJASN. The authors alone are responsible for the accuracy and presentation of the material.

Supplementary Table 1. *In silico* predictions for novel missense mutations

| Mutation Nomenclature |             | In silico prediction |                         |                           |
|-----------------------|-------------|----------------------|-------------------------|---------------------------|
| Nucleotide (cDNA)     | Protein     | SIFT                 | MutationTaster          | Polyphen-2                |
| c.1337G>A             | p.Arg446His | deleterious (0)      | disease causing (0,999) | possibly damaging (0.880) |
| c.1366G>T             | p.Val456Phe | deleterious (0)      | disease causing (0,991) | probably damaging (0.928) |

Supplemental material is neither peer-reviewed nor thoroughly edited by CJASN. The authors alone are responsible for the accuracy and presentation of the material.

Supplementary Figure 1: *MAGED2* gene structure showing the location of mutations detected. Each number above the exons corresponds to the number of the family in Table 1 and each number below the exons corresponds to the exons' number. The new mutations are in bold. Mutations of families F7 and F14 were previously described. The mutation marked by an asterisk (\*) was previously described as c.1462\_73del12, p.488\_91delEAAA.

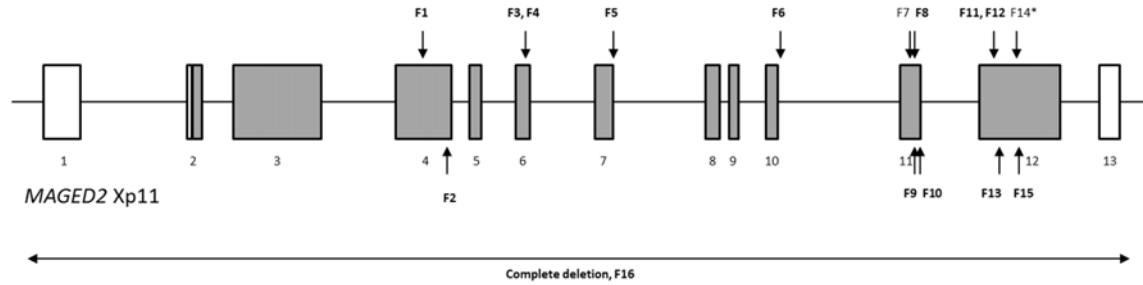

Supplemental material is neither peer-reviewed nor thoroughly edited by CJASN. The authors alone are responsible for the accuracy and presentation of the material.

Supplementary Figure 2: MLPA results showing the deletion of *MAGED2* gene: 3A, hemizygous deletion in the proband; 3B, heterozygous deletion in the mother and 3C, only one copy in the father.

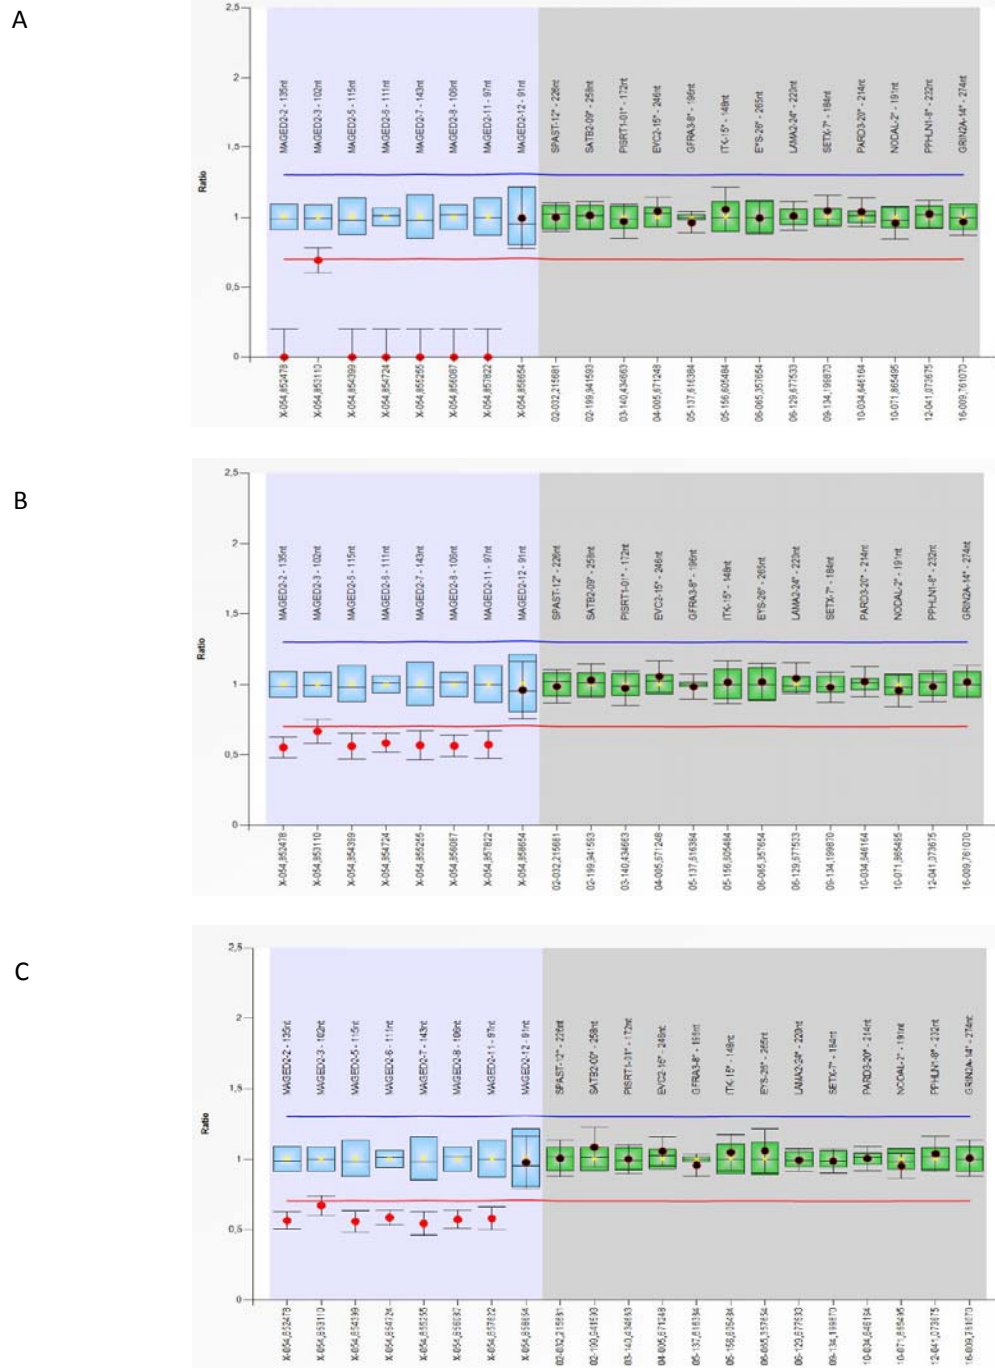

For exon 3, patient and parents have a ratio with ambiguous value (between 0.65 and 0.7). However, the two adjacent exons are deleted and the global profile of the mother is heterozygous, which suggests a hemizygous deletion in the proband. Exon-12 peak has been considered as non-interpretable (i.e., 2 copies for the father).

Supplemental material is neither peer-reviewed nor thoroughly edited by CJASN. The authors alone are responsible for the accuracy and presentation of the material.

Supplementary Figure 3: Molecular analysis of X-chromosome inactivation. Examples of two families, one with a bias and the other without. A) Results of X-chromosome inactivation for F2. B) Results of X-chromosome inactivation for F9. The values of relative X inactivation for mutated allele are in red.

A

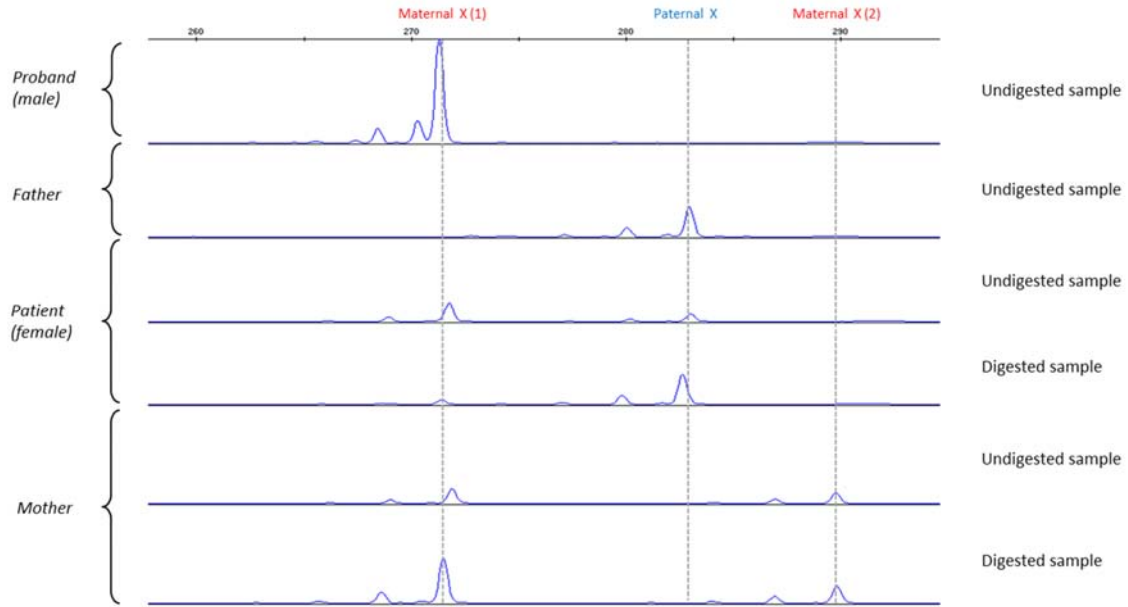

B

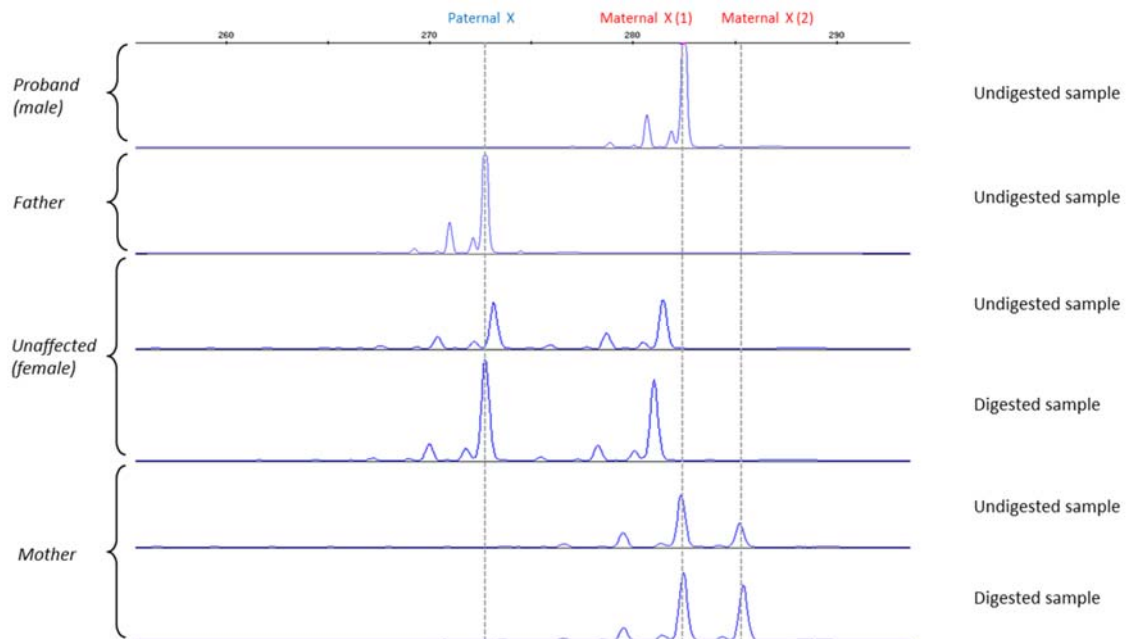

Supplemental material is neither peer-reviewed nor thoroughly edited by CJASN. The authors alone are responsible for the accuracy and presentation of the material.

Supplementary Figure 4. Comparison between different types of antenatal Bartter syndrome (\*\*\*)  $P < 0.0005$ ; \*\*  $P < 0.001$ ; \*  $P < 0.005$ )

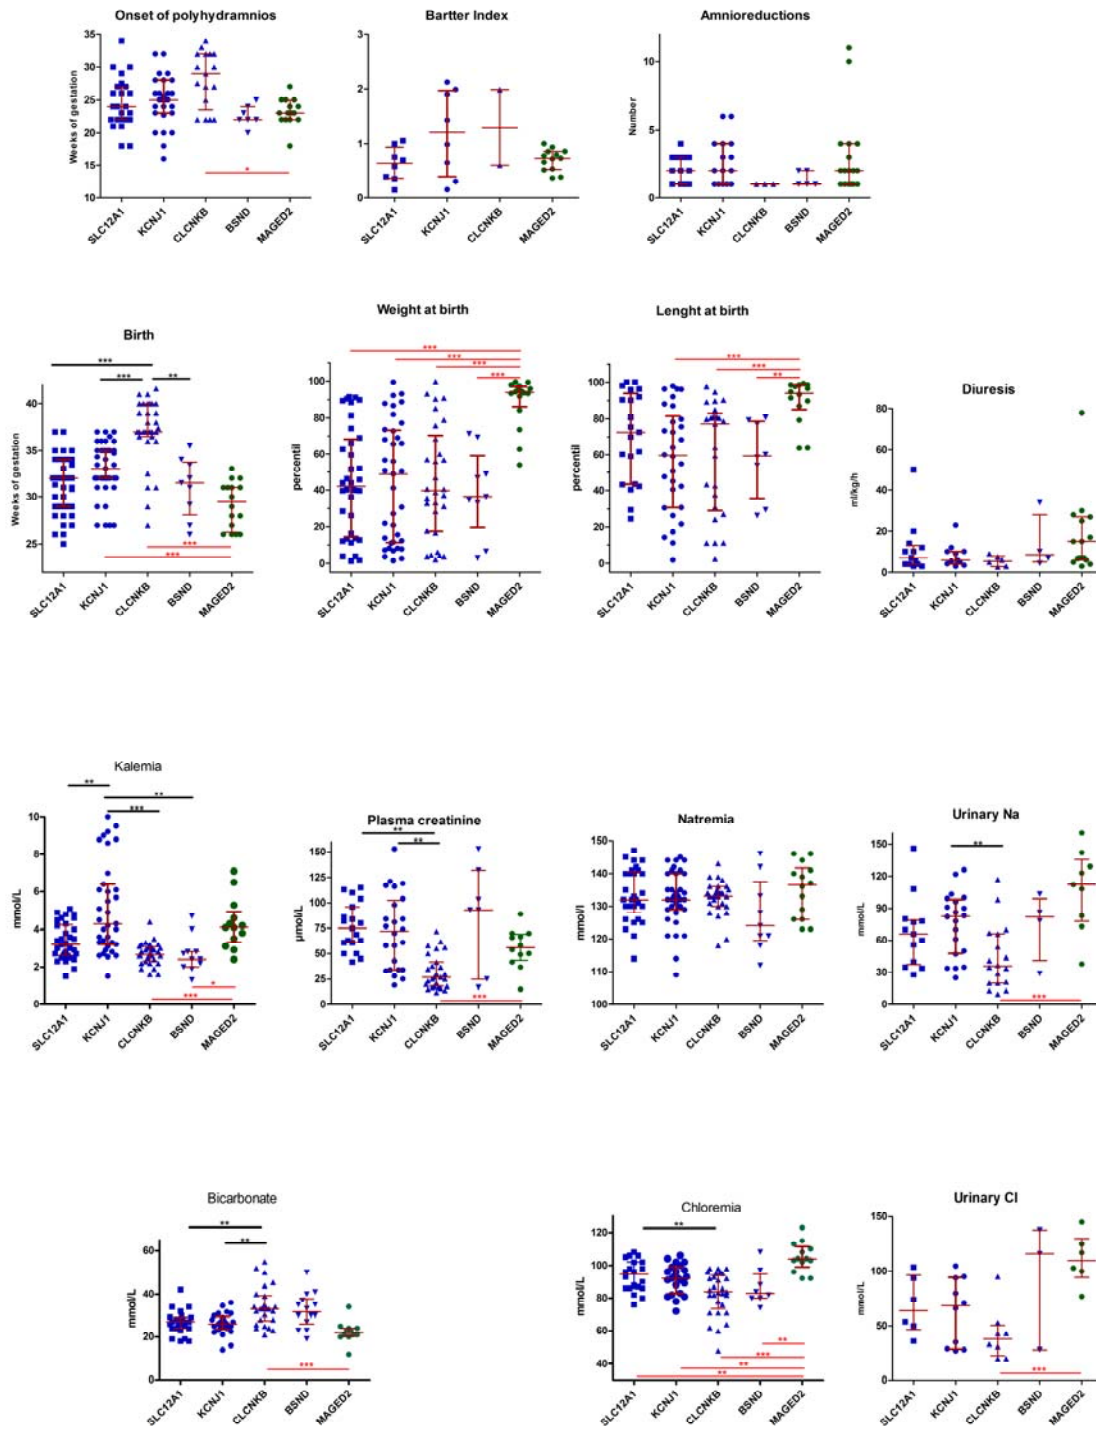

Supplemental material is neither peer-reviewed nor thoroughly edited by CJASN. The authors alone are responsible for the accuracy and presentation of the material.

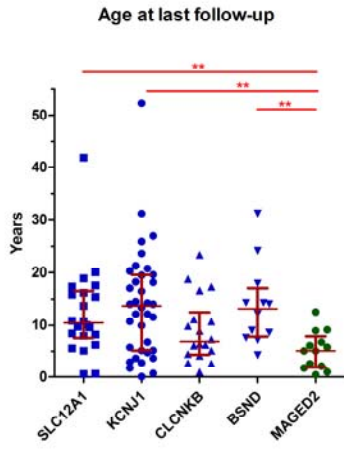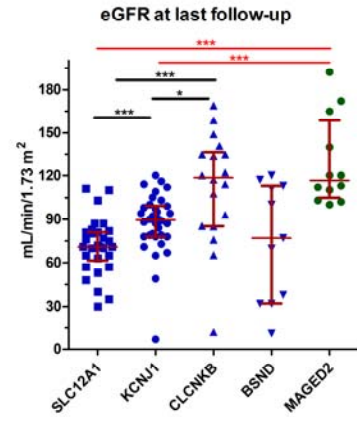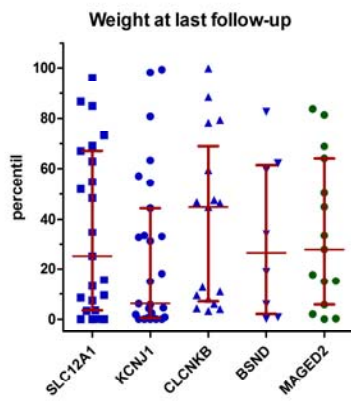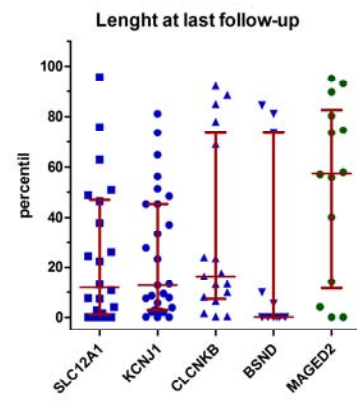

Supplement: CJN.05670517SupplementaryData.pdf [file CJN.05670517SupplementaryData.pdf]
